# Supplementary material
Source: PubMed Central journal article supplement (PMC3051410)
Supplement: NIHMS270552-supplement-1.pdf [file NIHMS270552-supplement-1.pdf]

**SUPPLEMENTARY TABLE S1. Summary of individual studies in INHANCE consortium pooled data version 1.1, by region and study period\***

| Study Location (Reference†)                                                                            | Recruitment period | Case subjects |                       |                        | Control subjects‡       |                       |
|--------------------------------------------------------------------------------------------------------|--------------------|---------------|-----------------------|------------------------|-------------------------|-----------------------|
|                                                                                                        |                    | Source        | Participation rate, % | Age eligibility, years | Source                  | Participation rate, % |
| <b>Europe</b>                                                                                          |                    |               |                       |                        |                         |                       |
| Milan, Italy <sup>9</sup>                                                                              | 1984–1989          | Hospital      | 95§                   | <80                    | Hospital (unhealthy)    | 95§                   |
| Aviano, Italy <sup>3</sup>                                                                             | 1984–1989          | Hospital      | >95§                  | >18                    | Hospital (unhealthy)    | 95§                   |
| Paris, France <sup>4*</sup>                                                                            | 1987–1992          | Hospital      | 95§                   | NA                     | Hospital (unhealthy)    | 95§                   |
| Italy (Aviano, Milan, Latina)¶¶ <sup>6</sup>                                                           | 1990–1999          | Hospital      | >95                   | 18–80                  | Hospital (unhealthy)    | 95                    |
| Switzerland <sup>13</sup>                                                                              | 1991–1997          | Hospital      | 95                    | <80                    | Hospital (unhealthy)    | 95                    |
| Central Europe (Banska Bystrica, Bucharest, Budapest, Lodz, Moscow)¶¶ <sup>10</sup>                    | 1998–2003          | Hospital      | 96                    | ≥15                    | Hospital (unhealthy)    | 97                    |
| Rome <sup>5</sup>                                                                                      | 2002–2007          | Hospital      | 98                    | NA                     | Hospital (unhealthy)    | 94                    |
| <b>North America</b>                                                                                   |                    |               |                       |                        |                         |                       |
| New York ¶¶ <sup>14</sup>                                                                              | 1981–1990          | Hospital      | 91                    | 21–80                  | Hospital (unhealthy)    | 97                    |
| Seattle, WA <sup>17</sup>                                                                              | 1985–1995          | Cancer        | 54.4,                 | 18–65                  | Random digit dialing    | 63,                   |
| Boston, MA <sup>16</sup>                                                                               | 1999–2003          | Hospital      | 88.7                  | ≥18                    | Resident list           | 48.7                  |
| Iowa <sup>18</sup>                                                                                     | 1993–2006          | Hospital      | 87                    | >17                    | Hospital (healthy)      | 92                    |
| North Carolina <sup>15</sup>                                                                           | 1994–1997          | Hospital      | 88                    | >17                    | Hospital (unhealthy)    | 86                    |
| Tampa, FL <sup>8</sup>                                                                                 | 1994–2003          | Hospital      | 98                    | ≥18                    | Cancer screening clinic | 90                    |
| Los Angeles, CA <sup>7</sup>                                                                           | 1999–2004          | Cancer        | 49                    | 18–65                  | Neighborhood            | 67.5                  |
| Houston, TX <sup>19</sup>                                                                              | 2001–2006          | Hospital      | 95                    | ≥18                    | Hospital visitors       | >80                   |
| <b>Latin America</b>                                                                                   |                    |               |                       |                        |                         |                       |
| Puerto Rico <sup>11</sup>                                                                              | 1992–1995          | Cancer        | 71                    | 21–79                  | Residential records     | 83                    |
| Latin America (Buenos Aires, Havana, Goiânia, Pelotas, Porto Alegre, Rio de Janeiro, São Paulo)¶¶ (NA) | 2000–2003          | Hospital      | 95                    | 15–79                  | Hospital (unhealthy)    | 86                    |
| <b>International</b>                                                                                   |                    |               |                       |                        |                         |                       |
| International (Italy, Spain, Ireland, Poland, Canada, Australia, Cuba, India, Sudan)¶¶ <sup>12</sup>   | 1992–1997          | Hospital      | 88.7                  | NA                     | Hospital/<br>Community  | 87.3                  |

\*INHANCE = International Head and Neck Cancer Epidemiology; NA = not applicable/not available.

†Representative publication in which study methods are described.

‡All studies frequency matched control subjects to case subjects on age and sex. Additional frequency matching factors included study center (Italy, Central Europe, Latin America, and International multicenter studies), hospital (France study), ethnicity (Tampa study), and neighborhood (Los Angeles study).

§Participation rate was not formally assessed, estimated response rate reported.

¶ Multicenter study.

¶¶Two response rates are reported because data were collected in two population-based case-control studies, the first from 1985–1989 among men and the second from 1990–1995 among men and women

\* Study not included in present analysis because all subjects were regular smokers.
