# Supplementary material
Source: PubMed Central journal article supplement (PMC3051410)
Supplement: NIHMS270552-supplement-2.pdf [file NIHMS270552-supplement-2.pdf]

## Oral cavity cancer

| Study name        | cases       | controls     | $\psi$      | Lower limit | Upper limit |
|-------------------|-------------|--------------|-------------|-------------|-------------|
| Aviano            | 85          | 855          | 6.99        | 0.32        | 152.39      |
| Italy multicenter | 131         | 2577         | 2.37        | 0.63        | 8.95        |
| Switzerland       | 138         | 883          | 9.50        | 1.27        | 71.13       |
| Central Europe    | 196         | 907          | 1.03        | 0.19        | 5.49        |
| New York          | 536         | 906          | 3.47        | 1.75        | 6.88        |
| Iowa              | 253         | 759          | 5.92        | 2.62        | 13.39       |
| Tampa             | 22          | 889          | 0.56        | 0.03        | 11.05       |
| Los Angeles       | 52          | 1004         | 11.60       | 1.56        | 86.18       |
| Texas             | 238         | 865          | 2.72        | 1.24        | 5.97        |
| Puerto Rico       | 93          | 521          | 14.94       | 2.06        | 108.33      |
| South America     | 459         | 1705         | 8.80        | 3.78        | 20.49       |
| Intl multicenter  | 323         | 988          | 1.36        | 0.61        | 3.04        |
| Boston            | 139         | 659          | 0.81        | 0.27        | 2.43        |
| Rome              | 17          | 294          | 0.41        | 0.03        | 6.54        |
| <b>Combined</b>   | <b>2682</b> | <b>13812</b> | <b>3.09</b> | <b>1.82</b> | <b>5.23</b> |

P for heterogeneity < 0.01

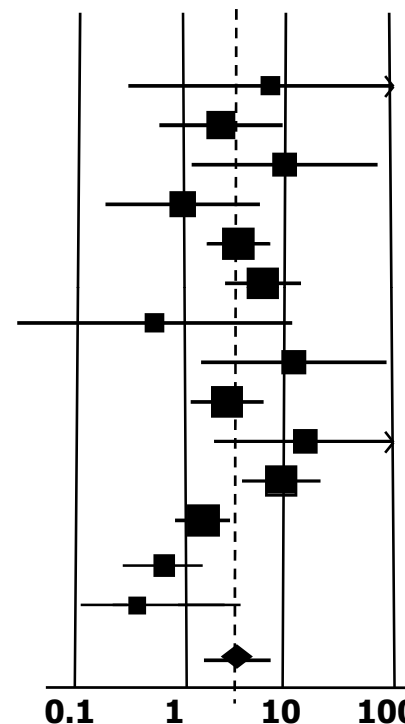

**$\psi$  and 95% CI**

Figure S1. Multiplicative interaction parameters ( $\psi$ ) for tobacco (cigarette, cigar, pipe, snuff, chewing tobacco) and alcohol study and combined, using INHANCE pooled data version 1.1. ORs used to calculate  $\psi$  were adjusted for age, sex, race/ethnicity, education level. The Milan, Seattle, and North Carolina studies are not included because there were no oral cavity cancer case of one of the joint effects.

## Pharyngeal cancer

| Study name        | cases       | controls     | $\psi$      | Lower limit | Upper limit |
|-------------------|-------------|--------------|-------------|-------------|-------------|
| Aviano            | 218         | 855          | 2.00        | 0.16        | 25.34       |
| Italy multicenter | 411         | 2577         | 5.44        | 1.09        | 27.07       |
| Switzerland       | 247         | 883          | 2.66        | 0.87        | 8.14        |
| New York          | 517         | 906          | 1.86        | 0.88        | 3.93        |
| Seattle           | 173         | 607          | 6.95        | 1.11        | 43.60       |
| Iowa              | 160         | 759          | 3.42        | 1.04        | 11.23       |
| North Carolina    | 61          | 202          | 2.25        | 0.24        | 21.35       |
| Tampa             | 58          | 889          | 1.06        | 0.27        | 4.18        |
| Los Angeles       | 167         | 1004         | 0.65        | 0.23        | 1.81        |
| Texas             | 426         | 865          | 1.58        | 0.90        | 2.77        |
| Puerto Rico       | 200         | 521          | 4.83        | 1.18        | 19.80       |
| South America     | 575         | 1705         | 2.92        | 1.06        | 8.05        |
| Intl multicenter  | 277         | 988          | 1.82        | 0.74        | 4.47        |
| Boston            | 291         | 659          | 0.91        | 0.35        | 2.35        |
| Rome              | 46          | 294          | 6.30        | 1.04        | 38.05       |
| <b>Combined</b>   | <b>3827</b> | <b>13714</b> | <b>1.90</b> | <b>1.41</b> | <b>2.56</b> |

P for heterogeneity < 0.01

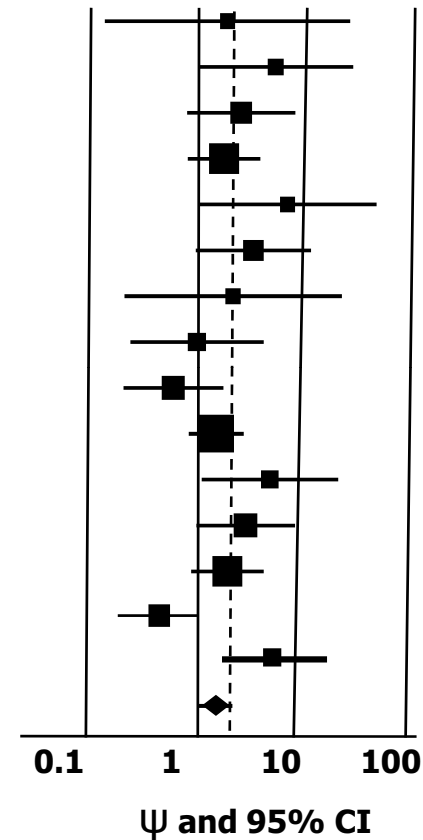

Figure S2. Multiplicative interaction parameters ( $\psi$ ) for tobacco (cigarette, cigar, pipe, snuff, chewing tobacco) and alcohol study and combined, using INHANCE pooled data version 1.1. ORs used to calculate  $\psi$  were adjusted for age, sex, race/ethnicity, education level. The Milan and Central Europe studies are not included because there were no pharyngeal cancer cases in the estimation of one of the joint effects.

### Laryngeal cancer

| Study name        | cases       | controls     | $\psi$      | Lower limit | Upper limit |
|-------------------|-------------|--------------|-------------|-------------|-------------|
| Milan             | 242         | 1531         | 0.94        | 0.27        | 3.31        |
| Italy multicenter | 460         | 2577         | 1.05        | 0.22        | 5.05        |
| Switzerland       | 124         | 883          | 18.73       | 1.64        | 213.71      |
| Central Europe    | 382         | 907          | 7.46        | 1.15        | 48.33       |
| Iowa              | 94          | 759          | 2.73        | 0.27        | 27.45       |
| Tampa             | 62          | 889          | 0.81        | 0.04        | 15.73       |
| Los Angeles       | 86          | 1004         | 2.42        | 0.47        | 12.42       |
| Texas             | 155         | 865          | 0.20        | 0.03        | 1.12        |
| South America     | 858         | 1705         | 1.20        | 0.58        | 2.49        |
| Rome              | 187         | 294          | 3.68        | 0.87        | 15.45       |
| <b>Combined</b>   | <b>2650</b> | <b>11414</b> | <b>1.62</b> | <b>0.85</b> | <b>3.09</b> |

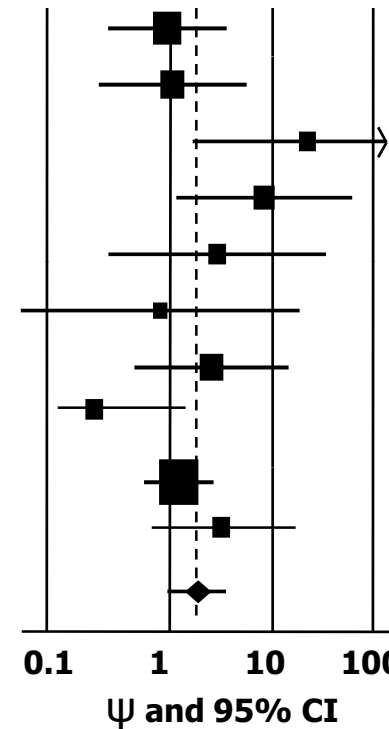

Figure S3. Multiplicative interaction parameters ( $\psi$ ) for tobacco (cigarette, cigar, pipe, snuff, chewing tobacco) and alcohol study and combined, using INHANCE pooled data version 1.1. ORs used to calculate  $\psi$  were adjusted for age, sex, race/ethnicity, education level. The Aviano, New York multicenter, Seattle, North Carolina, Puerto Rico, Intl multicenter studies are not included because there were no laryngeal cancer cases in this study or in the estimation of one of the joint effects.
